# Supplementary material
Source: PubMed Central journal article supplement (PMC8166192)
Supplement: pnas.2101571118.sapp.pdf [file pnas.2101571118.sapp.pdf]

## Supporting Information for

### **Trapping a crosslinked lysine–tryptophan radical in the catalytic cycle of the radical SAM enzyme SuiB**

Aidin R. Balo<sup>1</sup>, Alessio Caruso<sup>2</sup>, Lizhi Tao<sup>1</sup>, Dean J. Tantillo<sup>1</sup>, Mohammad R. Seyedsayamdost<sup>2,3\*</sup>, R. David Britt<sup>1\*</sup>.

#### **Affiliations:**

<sup>1</sup>Department of Chemistry, University of California, Davis, CA, 95616, United States

<sup>2</sup>Department of Chemistry, Princeton University, Princeton, NJ, 08544, United States

<sup>3</sup>Department of Molecular Biology, Princeton University, Princeton, NJ, 08544, United States

\*Correspondence to: [mrseyed@princeton.edu](mailto:mrseyed@princeton.edu), [rdbritt@ucdavis.edu](mailto:rdbritt@ucdavis.edu)

#### **This PDF file includes:**

Figures S1 to S12

Tables S1 to S4

Supporting Information References

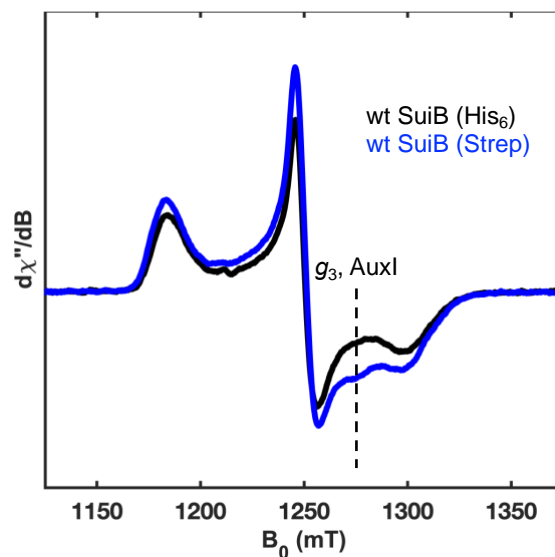

**Fig. S1.** Q-band EPR spectra of SuiB purified either using a His<sub>6</sub> tag followed by Fe-S reconstitution or using a Strep tag. The His<sub>6</sub>-tagged protein is missing a significant fraction of its AuxI clusters relative to the Strep-tagged protein (dotted line). See Figure 3A for spectral assignments of clusters. The Lys–Trp• intermediate could not be observed using the His<sub>6</sub>-tagged enzyme. Further, EPR spectra with a site-directed mutant that no longer binds AuxII (AuxII knockout mutant; AuxIIko) in Figure S4 suggest that the His<sub>6</sub> tag purification protocol also has an adverse effect on the RS cluster relative to the Strep tag purification protocol.

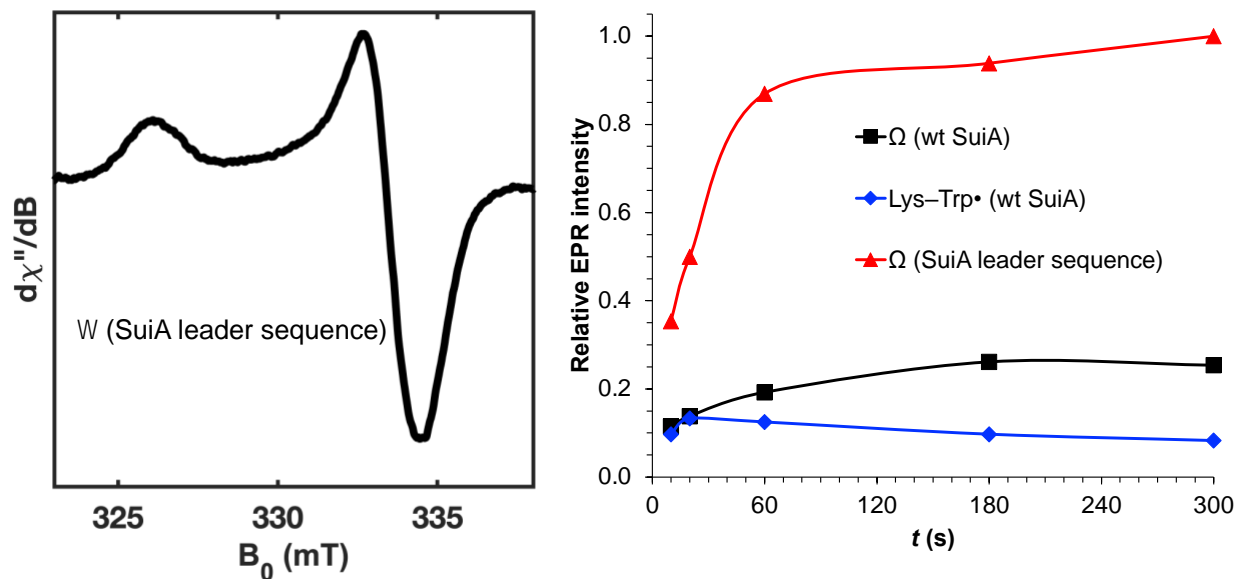

**Fig. S2.** (Left) The EPR spectrum of  $\Omega$  generated through the leader sequence peptide, closely resembling spectrum 3 in Figure 2A. (Right) Relative concentrations of paramagnetic intermediates trapped by flash freezing enzymatic reaction samples at various times ( $t$ ) using either the substrate (wt SuiA) or a substrate analogue containing only the SuiA leader sequence peptide, SuiA (-14)-(-1). In the reaction with wt SuiA, the concentration of Lys-Trp• exhibits an initial burst phase, reaching a maximum at  $\sim 20$ s and gradually decreasing as the reaction approaches steady state after  $\sim 1$  min. Levels of  $\Omega$  increase upon reaction initiation until steady state ( $\sim 1$  min). In the reaction of SuiB with the SuiA leader peptide, Lys-Trp• is not observed, and  $\Omega$  follows the same trend as in wt SuiA, but with a 4-fold increase in signal intensity.

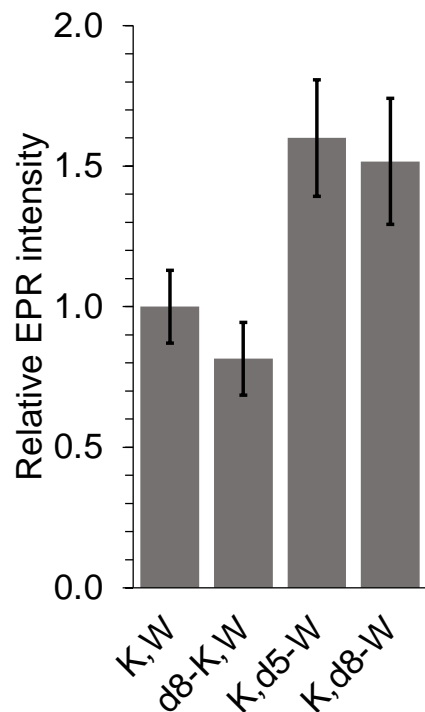

**Fig. S3.** The effect of selective deuteration on the relative concentration of Lys–Trp• observed after 20 s. Lys2 side chain deuteration decreases [Lys–Trp•] by ~20%. Conversely, Trp6 indole and uniform deuteration increase [Lys–Trp•] by ~60%. The error bars represent the standard deviation of samples prepared in triplicates.

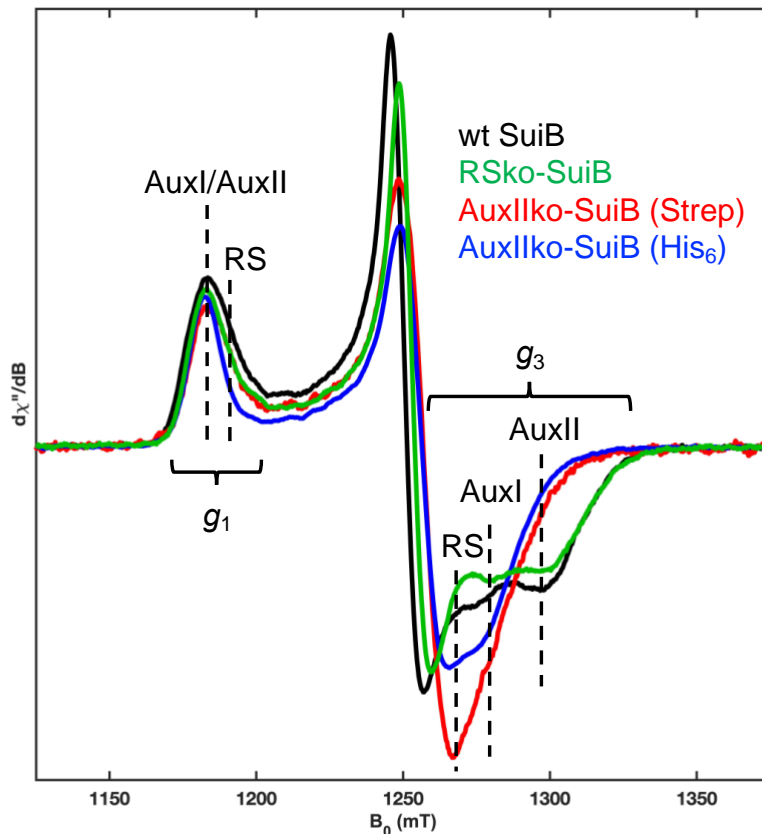

**Fig. S4.** EPR spectra used to deconvolute the signal of each Fe-S cluster in Figure 3A. The  $g_1$  and  $g_3$  components of each cluster are highlighted. The Strep–AuxII knockout mutant (C409A/C415A) allowed for straightforward deconvolution of the dominating AuxII cluster signal. The RS cluster knockout mutant (C121A/C124A) allowed for separation of the RS cluster signal. While an RS cluster signal could be obtained this way, it resulted in a poor S/N ratio due to the low signal intensity of the RS cluster in the wt SuiB (see Figure 3B). Varying the preparation of the AuxII knockout mutant (His<sub>6</sub> vs. Strep tag) resulted in great contrast between residual RS cluster and AuxI cluster spectral components, presumably due to an adverse effect that the His<sub>6</sub> preparation exhibits on the RS cluster. Consistent with prior studies (1), the AuxI knockout mutant (C321A/C365A) was not soluble and therefore could not be purified.

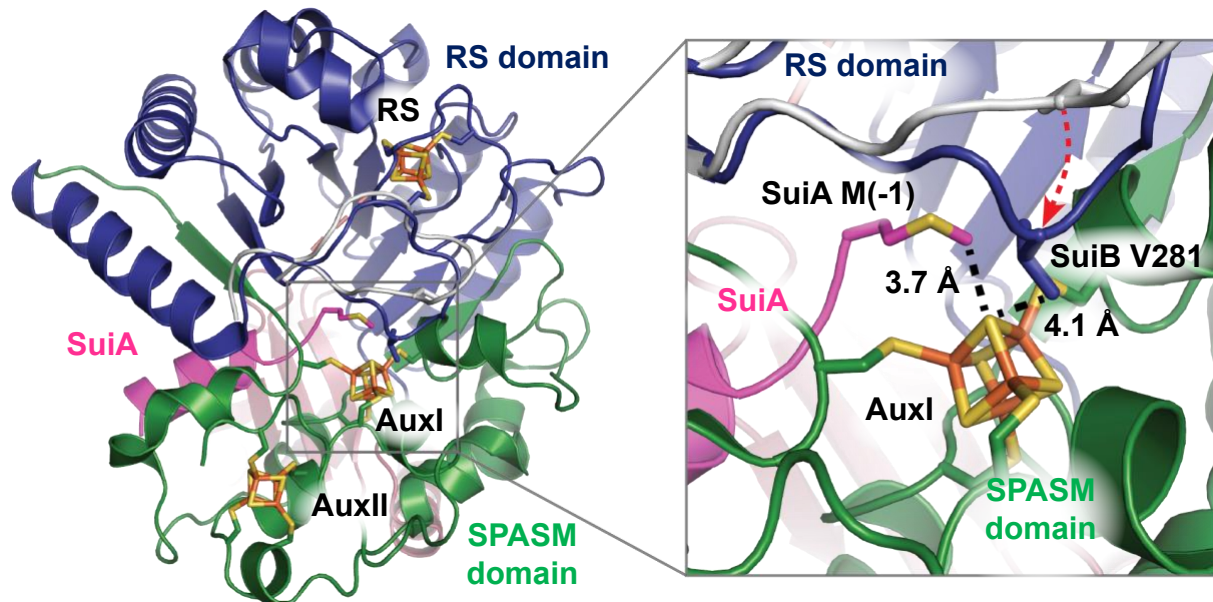

**Fig. S5.** Crystallographic comparison showing interaction between AuxI of SuiB and substrate SuiA (PDB ID: 5V1S, 5V1T) (2). Features of the apo-SuiA structure are shown in grey, while the SuiA-bound structure is colored by domain. Upon binding SuiA in both wt SuiB and RSKo-SuiB, the EPR signal of AuxI diminishes (See Figure 3B). Only the leader sequence portion of SuiA is resolved in the crystal structure (residues -14 to -1).

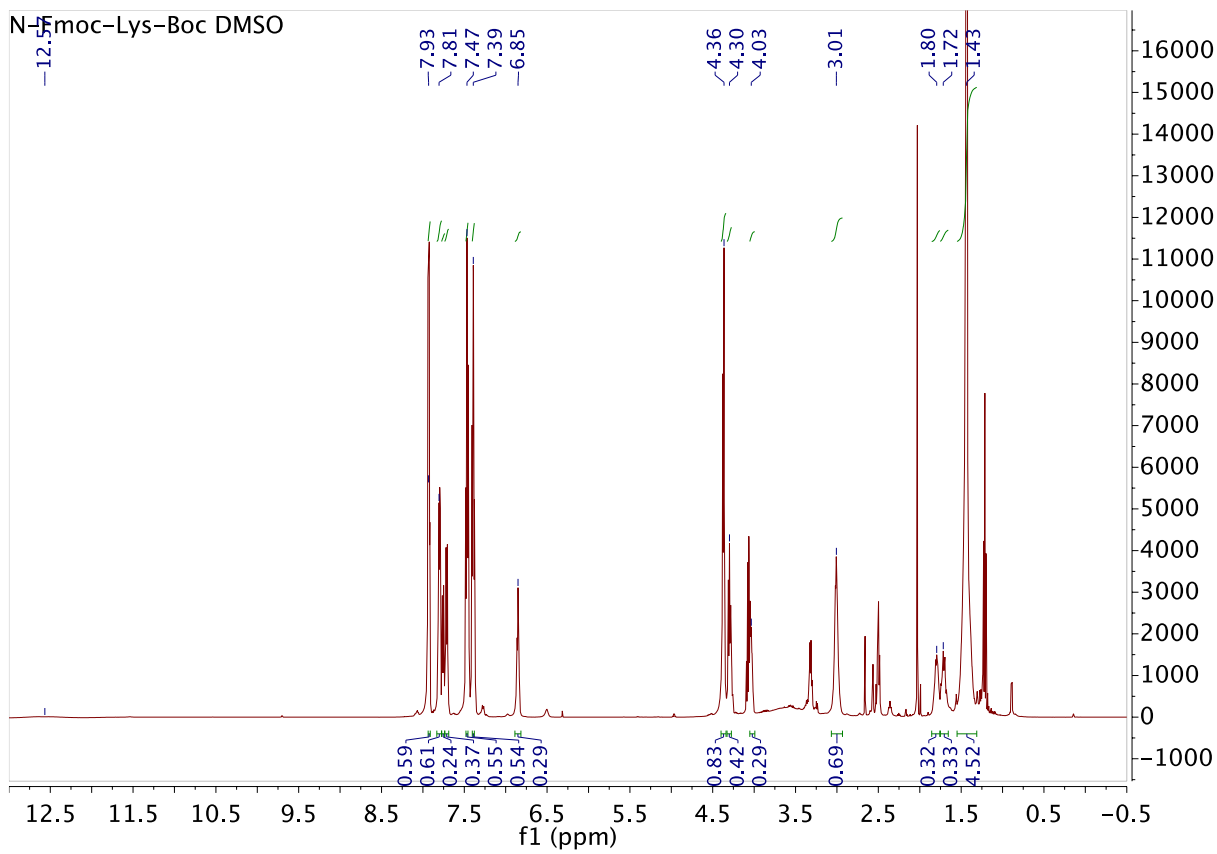

**Fig. S6.**  $^1\text{H-NMR}$  spectrum of Fmoc-L-Lys(Boc)-OH used in SuiA synthesis.

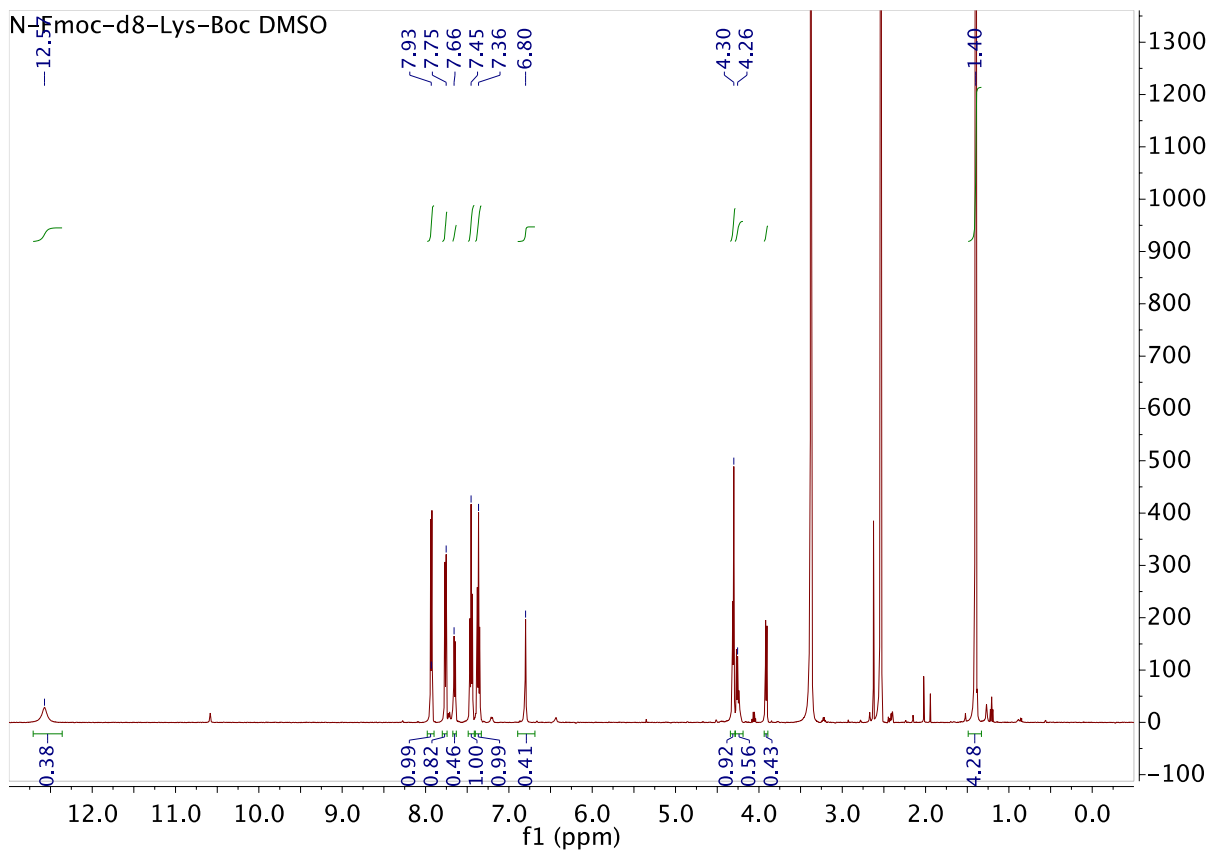

**Fig. S7.** <sup>1</sup>H-NMR spectrum of Fmoc-d<sub>8</sub>-L-Lys(Boc)-OH used in SuiA synthesis.



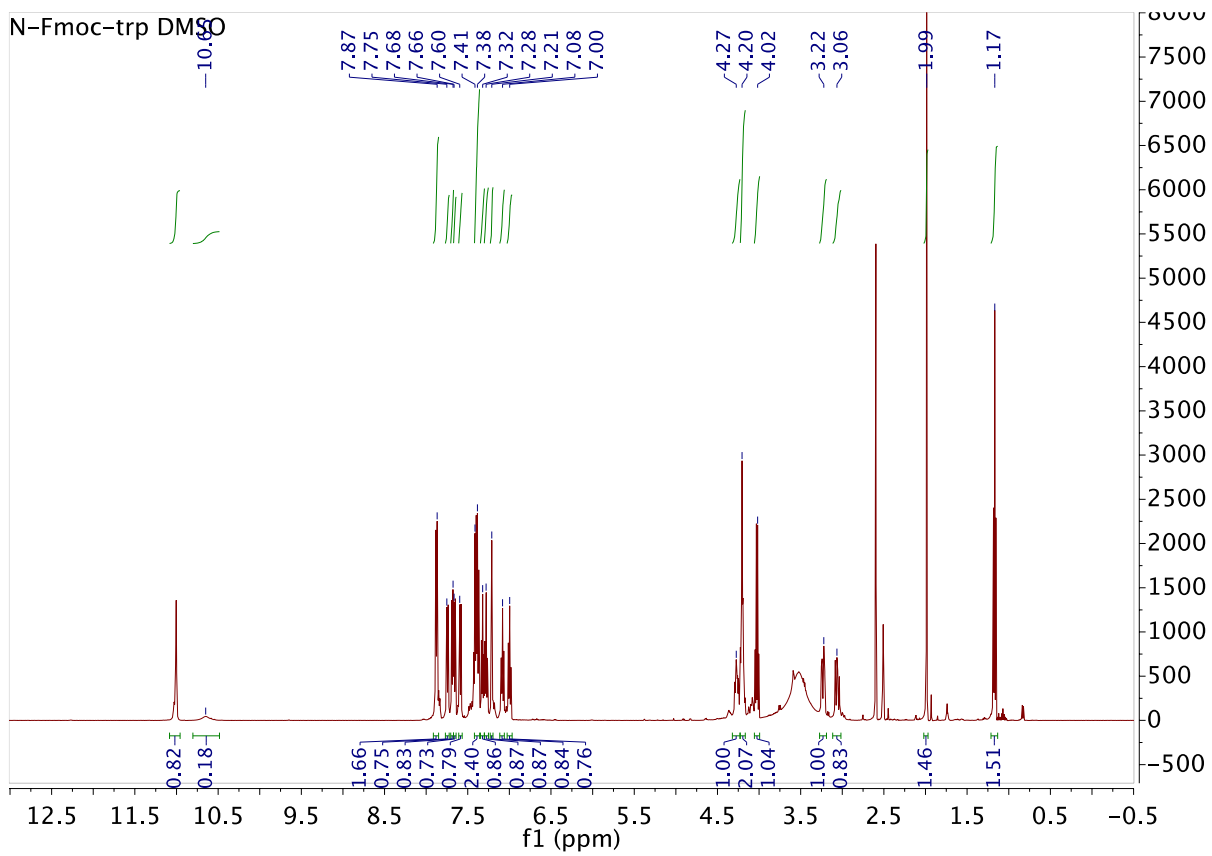

**Fig. S8.**  $^1\text{H-NMR}$  spectrum of Fmoc-L-Trp-OH used in SuiA synthesis.

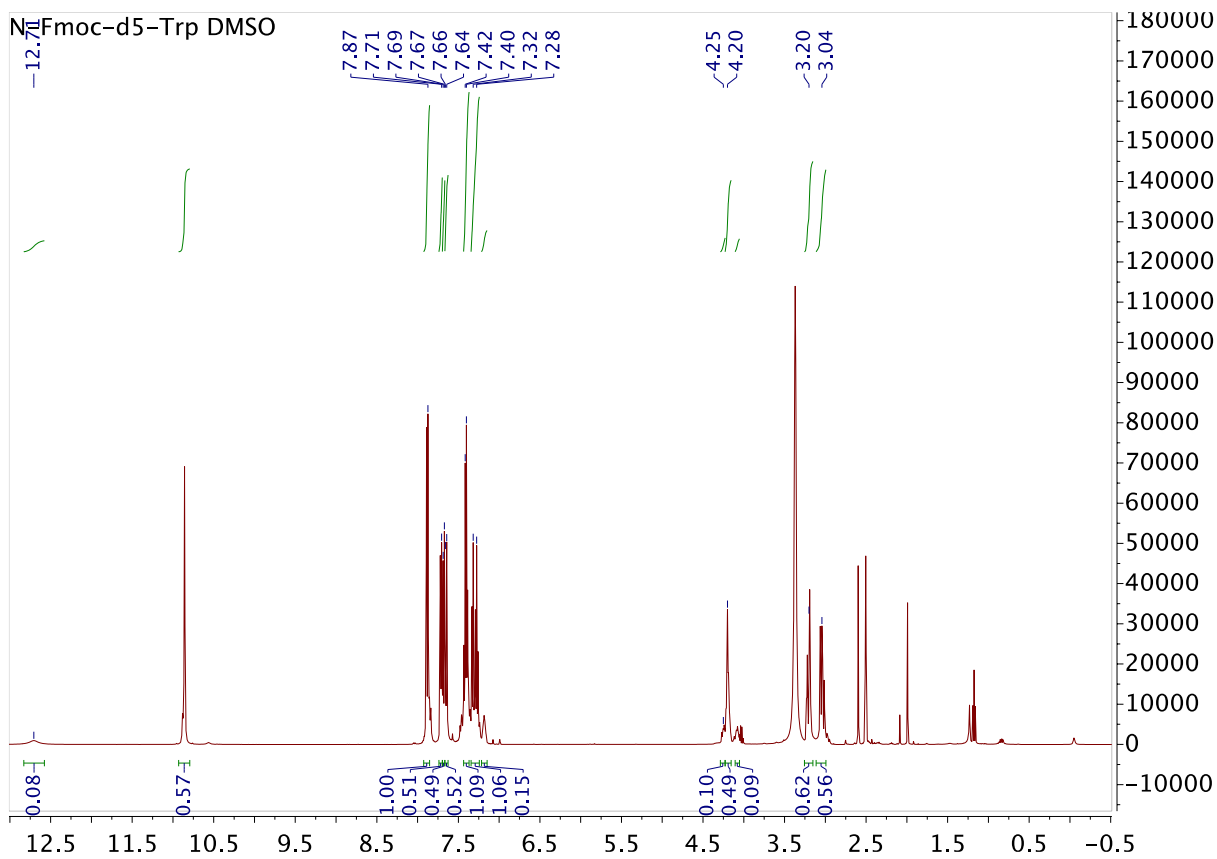

**Fig. S9.** <sup>1</sup>H-NMR spectrum of Fmoc-d<sub>5</sub>-L-Trp-OH used in SuiA synthesis.

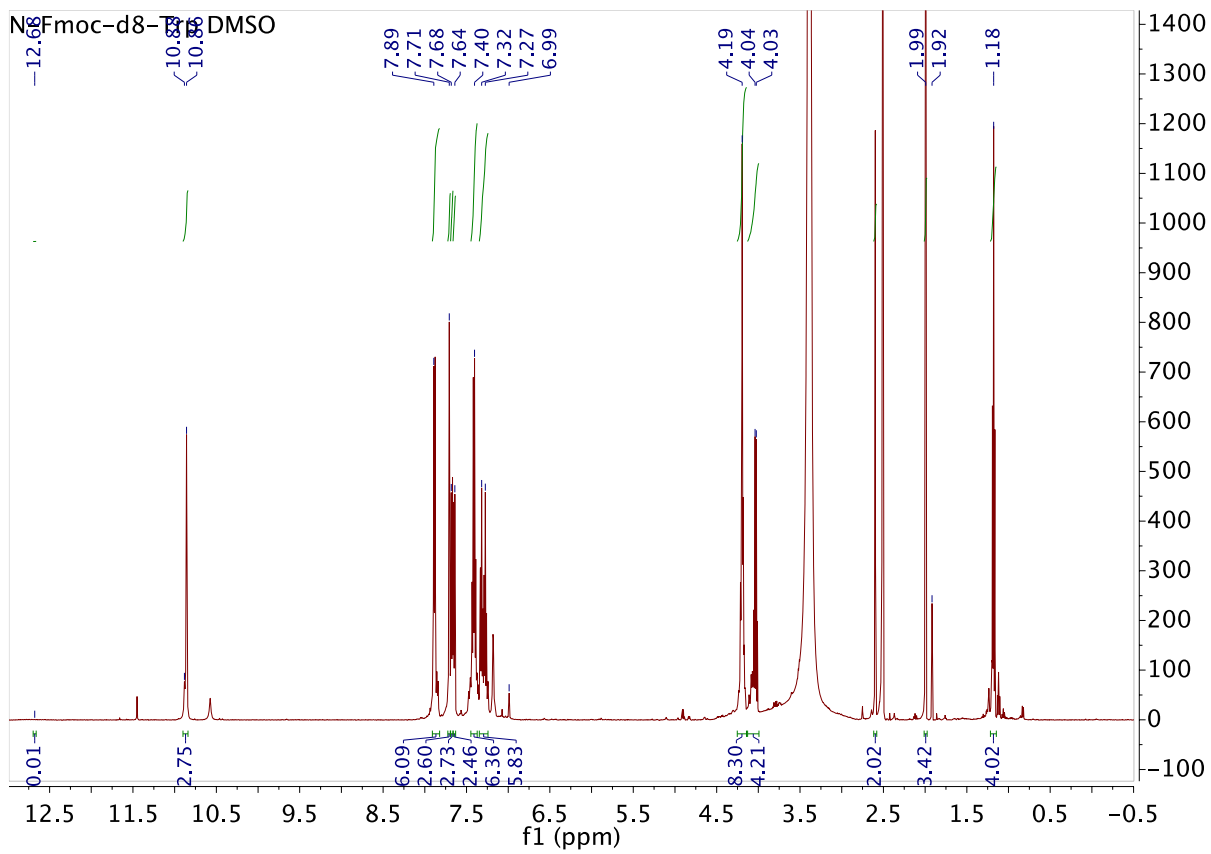

**Fig. S10.** <sup>1</sup>H-NMR spectrum of Fmoc-d<sub>8</sub>-L-Trp-OH used in SuiA synthesis.

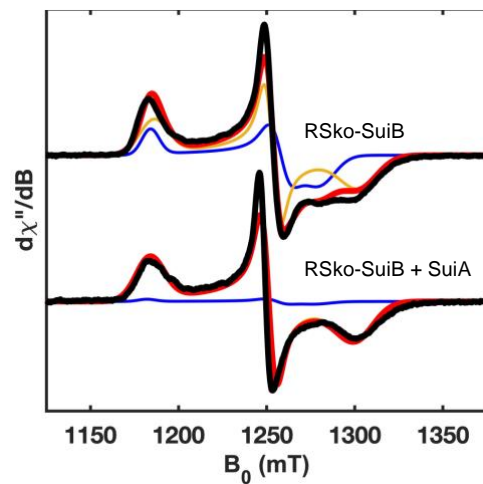

**Fig. S11.** The effect of obtaining a low-potential AuxI cluster upon binding SuiA shown in Figure 3B is also apparent in Rsko-SuiB, in which the signal intensity of AuxI relative to AuxII decreases from 45% to 5%.

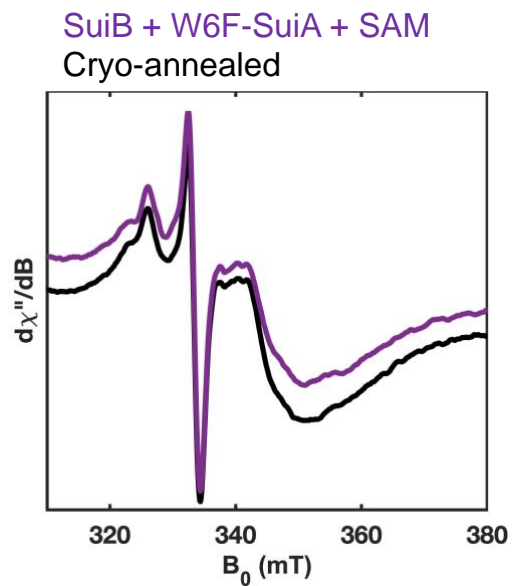

**Fig. S12.** Using a SuiB + DT + W6F-SuiA + SAM “reaction” sample as a negative control for the cryo-annealing result shown in Figure 3C. In the absence of the substrate Trp6, the clear accumulation of the modified AuxI signal upon cryo-annealing at 200 K for 10 min is not observed.

**Table S1.** Comparison of various tryptophan radicals to SuiA Lys–Trp•.

| Species              | <i>g</i> | <i>A</i> <sub>N1</sub>  <br>(mT) | <i>A</i> <sub>H1</sub>  <br>(mT) | <i>A</i> <sub>H2</sub>  <br>(mT) | <i>A</i> <sub>HP1,W</sub>  <br>(mT) | <i>A</i> <sub>HP2,W</sub>  <br>(mT) | <i>A</i> <sub>4</sub>  <br>(mT) | <i>A</i> <sub>5</sub>  <br>(mT) | <i>A</i> <sub>6</sub>  <br>(mT) | <i>A</i> <sub>7</sub>  <br>(mT) | <i>A</i> <sub>HP,K</sub>  <br>(mT) |
|----------------------|----------|----------------------------------|----------------------------------|----------------------------------|-------------------------------------|-------------------------------------|---------------------------------|---------------------------------|---------------------------------|---------------------------------|------------------------------------|
| <b>EPR</b>           | 2.0042   |                                  |                                  |                                  |                                     |                                     | 0.71                            |                                 | <b>1.78</b>                     | <b>2.85</b>                     |                                    |
| K16–W20•             | 2.0042   |                                  |                                  |                                  |                                     |                                     | <b>1.78</b>                     |                                 | 0.71                            | <b>2.85</b>                     |                                    |
| SuiA/SuiB            | 2.0042   |                                  |                                  |                                  |                                     |                                     | <b>1.07</b>                     |                                 | <b>1.07</b>                     | <b>2.85</b>                     |                                    |
| <b>DFT</b>           | 2.0022   | 0.08                             | 0.02                             | 0.05                             | 0.05                                | 0.21                                | 0.56                            | 0.51                            | <b>1.77</b>                     | <b>4.20</b>                     | 0.00                               |
| K16–W20•             | 2.0026   | 0.07                             | 0.15                             | 0.04                             | 0.02                                | 0.11                                | <b>2.07</b>                     | 0.25                            | 0.46                            | <b>4.34</b>                     | 0.23                               |
| SuiA/SuiB            | 2.0030   | 0.05                             | 0.16                             | 0.06                             | 0.02                                | 0.10                                | <b>1.35</b>                     | 0.18                            | <b>1.18</b>                     | <b>4.12</b>                     | 0.05                               |
| <b>EPR (3)</b>       | 2.0035   |                                  | 0.10                             | 0.28                             | <b>2.35</b>                         | <b>1.13</b>                         | 0.64                            |                                 |                                 |                                 | N/A                                |
| W•                   | 2.0025   |                                  | 0.19                             | 0.04                             | <b>2.75</b>                         | <b>1.13</b>                         |                                 | 0.62                            |                                 |                                 |                                    |
| <i>P. eryngii</i> VP | 2.0022   | <b>1.00</b>                      | 0.07                             | 0.11                             | <b>2.70</b>                         | <b>1.18</b>                         | 0.49                            | 0.46                            |                                 |                                 |                                    |
| <b>EPR (4)</b>       | 2.0035   |                                  |                                  |                                  | <b>2.15</b>                         | <b>1.75</b>                         | 0.64                            |                                 |                                 |                                 | N/A                                |
| W•                   | 2.0025   |                                  |                                  |                                  | <b>2.30</b>                         | <b>1.95</b>                         |                                 | 0.62                            |                                 |                                 |                                    |
| <i>B. adusta</i> VP  | 2.0022   | <b>1.05</b>                      |                                  |                                  | <b>2.30</b>                         | <b>1.95</b>                         | 0.49                            | 0.46                            |                                 |                                 |                                    |
| <b>EPR (5)</b>       | 2.0033   |                                  | 0.11                             |                                  | <b>2.70</b>                         | <b>1.38</b>                         | 0.68                            |                                 |                                 |                                 | N/A                                |
| W111• Y122F          | 2.0024   |                                  | 0.19                             |                                  | <b>2.75</b>                         | <b>1.38</b>                         |                                 | 0.61                            |                                 |                                 |                                    |
| <i>E. coli</i> RNR   | 2.0021   | <b>1.05</b>                      | 0.07                             |                                  | <b>2.83</b>                         | <b>1.38</b>                         | 0.50                            | 0.51                            |                                 |                                 |                                    |
| <b>EPR (5)</b>       | 2.0035   |                                  |                                  |                                  |                                     | <b>2.25</b>                         | 0.56                            |                                 |                                 |                                 | N/A                                |
| W177• Y177F          | 2.0025   |                                  |                                  |                                  |                                     | <b>2.25</b>                         |                                 | 0.63                            |                                 |                                 |                                    |
| <i>E. coli</i> RNR   | 2.0023   | 0.94                             |                                  |                                  |                                     | <b>2.25</b>                         | 0.46                            | 0.52                            |                                 |                                 |                                    |
| <b>EPR (6)</b>       | 2.0036   |                                  |                                  |                                  | 0.75                                | 0.58                                | 0.60                            |                                 | 0.53                            |                                 | N/A                                |
| W48•                 | 2.0027   |                                  |                                  |                                  | 0.75                                | 0.58                                |                                 |                                 |                                 |                                 |                                    |
| AzC                  | 2.0022   | <b>1.07</b>                      |                                  |                                  | 0.98                                | 0.83                                | 0.51                            |                                 | 0.36                            |                                 |                                    |
| <b>EPR (6)</b>       | 2.0035   |                                  |                                  |                                  | 0.16                                | <b>1.02</b>                         | 0.77                            |                                 | 0.64                            |                                 | N/A                                |
| W108•                | 2.0026   |                                  |                                  |                                  | 0.16                                | <b>1.39</b>                         |                                 |                                 |                                 |                                 |                                    |
| ReAzs                | 2.0022   | 0.83                             |                                  |                                  | 0.51                                | <b>1.39</b>                         | 0.46                            |                                 | 0.54                            |                                 |                                    |
| <b>DFT (3)</b>       | 2.0037   | 0.13                             | 0.08                             | 0.16                             | <b>2.79</b>                         | <b>1.07</b>                         | 0.60                            |                                 | 0.10                            |                                 | N/A                                |
| W•                   | 2.0029   | 0.12                             | 0.18                             | 0.07                             | <b>3.06</b>                         | <b>1.12</b>                         | 0.18                            |                                 | 0.56                            |                                 |                                    |
| (21° from plane)     | 2.0025   | <b>1.19</b>                      | 0.06                             | 0.15                             | <b>2.85</b>                         | <b>1.38</b>                         | 0.48                            |                                 | 0.37                            |                                 |                                    |

**Table S2.** Energy required for oxidation of radical anions to neutral molecules acquired experimentally as well as through DFT calculations at the M06-2X/6-31+G(d,p) level of Lys-Trp<sup>•-</sup> and similar compounds.

| <b>Species</b>                                | <b>Energy required for oxidation (experimental) (7)</b> | <b>Energy required for oxidation (computational)</b> |
|-----------------------------------------------|---------------------------------------------------------|------------------------------------------------------|
| Lys-Trp <sup>•-</sup><br>Doubly methyl-capped | N/A                                                     | -21 kcal/mol                                         |
| Lys-Trp <sup>•-</sup><br>Macrocyclic          | N/A                                                     | -8 kcal/mol                                          |
| Indole anion                                  | +0.1 kcal/mol                                           | 0 kcal/mol                                           |
| Benzaldehyde anion                            | +9 kcal/mol                                             | +10 kcal/mol                                         |
| Benzophenone anion                            | +15 kcal/mol                                            | +16 kcal/mol                                         |
| Nitrobenzene anion                            | +23 kcal/mol                                            | +28 kcal/mol                                         |

**Table S3.** DFT atomic coordinates (in Å) used in Figure 2B.

|   |           |           |           |
|---|-----------|-----------|-----------|
| C | 1.104058  | -3.888502 | -0.058082 |
| C | 0.639267  | -2.560566 | 0.462690  |
| C | -0.149603 | -2.322399 | 1.583589  |
| C | 0.927853  | -1.262443 | -0.113780 |
| C | 1.676119  | -0.857898 | -1.264236 |
| C | 0.293487  | -0.289965 | 0.694672  |
| N | -0.346856 | -0.951662 | 1.710386  |
| C | 1.750822  | 0.531146  | -1.556534 |
| C | 0.338273  | 1.193046  | 0.476502  |
| C | 1.135191  | 1.497542  | -0.774857 |
| H | 0.736394  | -4.721637 | 0.572966  |
| H | 2.213301  | -3.953126 | -0.088587 |
| H | 0.748763  | -4.069486 | -1.095567 |
| H | -0.588851 | -3.021095 | 2.304617  |
| H | 2.177402  | -1.597962 | -1.904934 |
| H | -0.897780 | -0.510367 | 2.447514  |
| H | 2.320504  | 0.855945  | -2.442761 |
| H | -0.707681 | 1.570557  | 0.326376  |
| H | 1.226918  | 2.561370  | -1.047792 |
| C | 0.892830  | 1.962554  | 1.707188  |
| H | 0.903760  | 3.053711  | 1.509161  |
| H | 0.267246  | 1.788160  | 2.606778  |
| H | 1.928581  | 1.637077  | 1.931691  |



**Table S4.** Summary of [4Fe-4S]<sup>+</sup> *g*-tensors reported.

| <b>Cluster</b> | <b>Solution strategy</b>           | <b><i>g</i><sub>1</sub></b> | <b><i>g</i><sub>2</sub></b> | <b><i>g</i><sub>3</sub></b> |
|----------------|------------------------------------|-----------------------------|-----------------------------|-----------------------------|
| RS             | Knockout mutation, 10K             | 2.048                       | 1.936                       | 1.916                       |
| AuxI           | Knockout mutation, 10K             | 2.060                       | 1.939                       | 1.904                       |
| AuxII          | Knockout mutation, 10K             | 2.057                       | 1.946                       | 1.872                       |
| AuxI           | Reaction sample without SuiA, 35K  | 2.066                       | 1.946                       | 1.905                       |
| AuxI           | Cryo-annealed reaction sample, 35K | 2.075                       | 1.944                       | 1.908                       |

## Supporting Information References

1. K. R. Schramma, L. B. Bushin, M. R. Seyedsayamdost, Structure and biosynthesis of a macrocyclic peptide containing an unprecedented lysine-to-tryptophan crosslink. *Nat Chem* **7**, 431-437 (2015).
2. K. M. Davis *et al.*, Structures of the peptide-modifying radical SAM enzyme SuiB elucidate the basis of substrate recognition. *Proc Natl Acad Sci U S A* **114**, 10420-10425 (2017).
3. R. Pogni *et al.*, A tryptophan neutral radical in the oxidized state of versatile peroxidase from *Pleurotus eryngii*: a combined multifrequency EPR and density functional theory study. *J Biol Chem* **281**, 9517-9526 (2006).
4. R. Pogni *et al.*, Tryptophan-based radical in the catalytic mechanism of versatile peroxidase from *Bjerkandera adusta*. *Biochemistry* **44**, 4267-4274 (2005).
5. G. Bleifuss *et al.*, Tryptophan and tyrosine radicals in ribonucleotide reductase: a comparative high-field EPR study at 94 GHz. *Biochemistry* **40**, 15362-15368 (2001).
6. S. Stoll *et al.*, Hydrogen bonding of tryptophan radicals revealed by EPR at 700 GHz. *J Am Chem Soc* **133**, 18098-18101 (2011).
7. P. J. Linstrom, NIST chemistry webbook. <http://webbook.nist.gov>, (2005).
